# Supplementary material for: Megabodies expand the nanobody toolkit for protein structure determination by single-particle cryo-EM
Source: bioRxiv or medRxiv preprint supplement (doi:10.1101/812230), 2019-10-22
Supplement: Supplementary file [file media-2.pdf]

## SUPPLEMENTARY INFORMATION

# Megabodies expand the nanobody toolkit for protein structure determination by single-particle cryo-EM

Tomasz Uchański<sup>1,2</sup>, Simonas Masiulis<sup>3</sup>, Baptiste Fischer<sup>1,2</sup>, Valentina Kalichuk<sup>1,2</sup>, Alexandre Wohlkönig<sup>1,2</sup>, Thomas Zögg<sup>1,2</sup>, Han Remaut<sup>1,2</sup>, Wim Vranken<sup>1,2,4</sup>, A. Radu Aricescu<sup>3,5,\*</sup>, Els Pardon<sup>1,2</sup> & Jan Steyaert<sup>1,2,\*</sup>

## AFFILIATIONS

<sup>1</sup> Structural Biology Brussels, Vrije Universiteit Brussel (VUB), Brussels, Belgium

<sup>2</sup> VIB-VUB Center for Structural Biology, VIB, Brussels, Belgium.

<sup>3</sup> MRC Laboratory of Molecular Biology, Cambridge Biomedical Campus, Cambridge, UK.

<sup>4</sup> Interuniversity Institute of Bioinformatics in Brussels, ULB-VUB, 1050 Brussels, Belgium

<sup>5</sup> Division of Structural Biology, Wellcome Centre for Human Genetics, University of Oxford, Oxford, UK.

\* Corresponding authors

Keywords: megabody, nanobody, single-particle cryo-EM

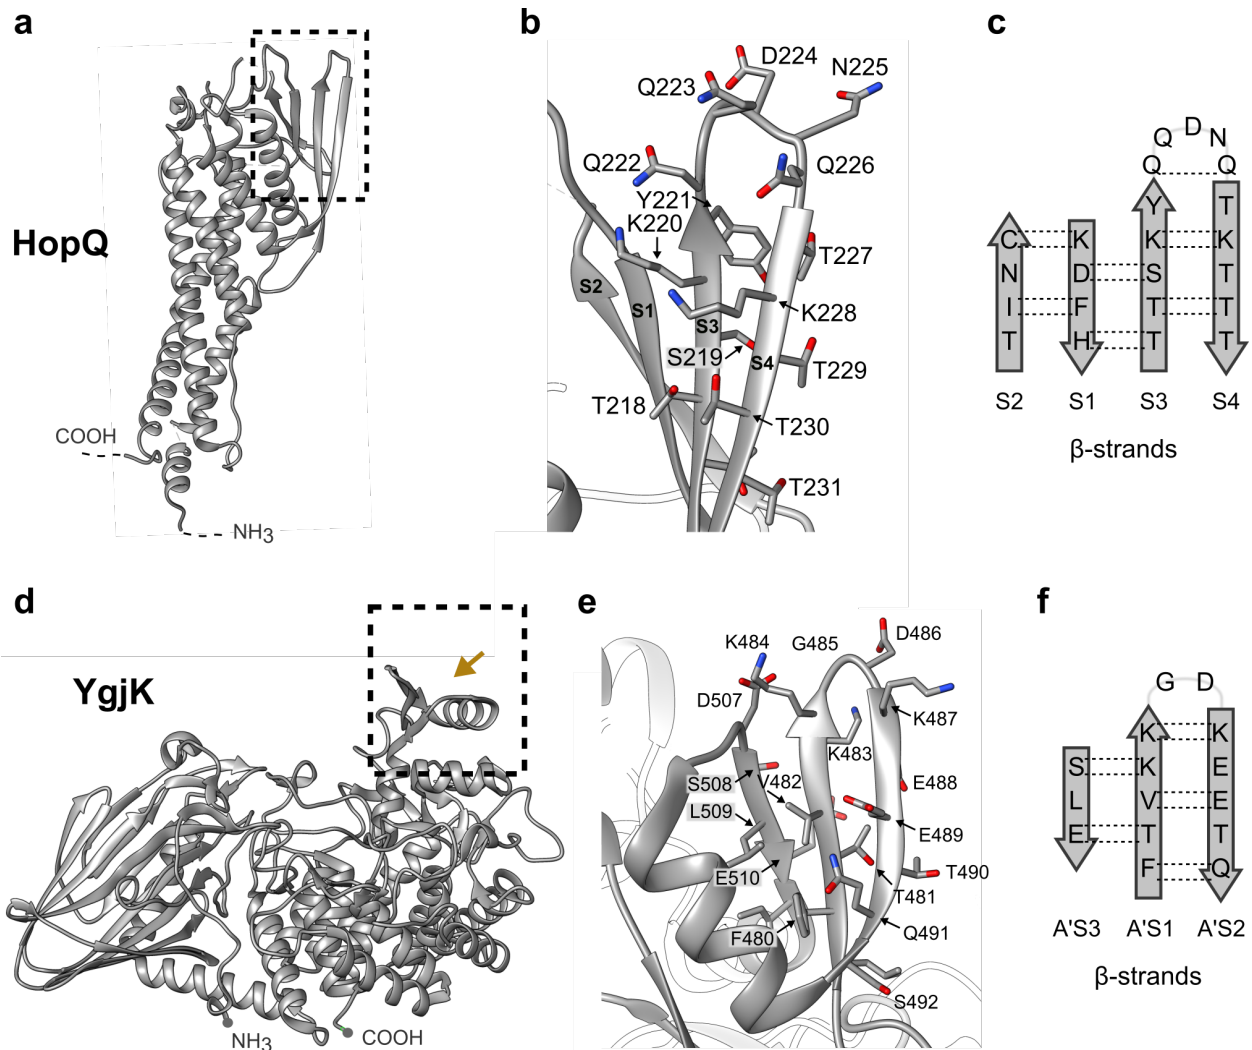

**Supplementary Figure 1. Structures of the scaffold proteins HopQ and YgjK.** **a-c**, Cartoon representation of the extracellular adhesin domain of *H. pylori* crystal structure (HopQ, PDB ID: 5LP2). **a**, The flexible N- and C-terminal regions are invisible in the electron density and are indicated by dashed lines. The boxed region is enlarged in **(b)**. Residues are numbered according to UniProtKB B5Z8H1. **c**, Secondary structure of the solvent-exposed S3-S4  $\beta$ -turn. Hydrogen bonds between the backbone atoms are indicated by dotted lines. **d-f**, Cartoon representation of the *E. coli* K12 Glucosidase crystal structure (YgjK, PDB ID: 3W7T). **d**, N- and C-termini are indicated by dots. The boxed region is enlarged in **(e)**. Residues are numbered according to UniProtKB P42592. **f**, Secondary structure of the solvent-exposed A'S1-A'S2  $\beta$ -turn.

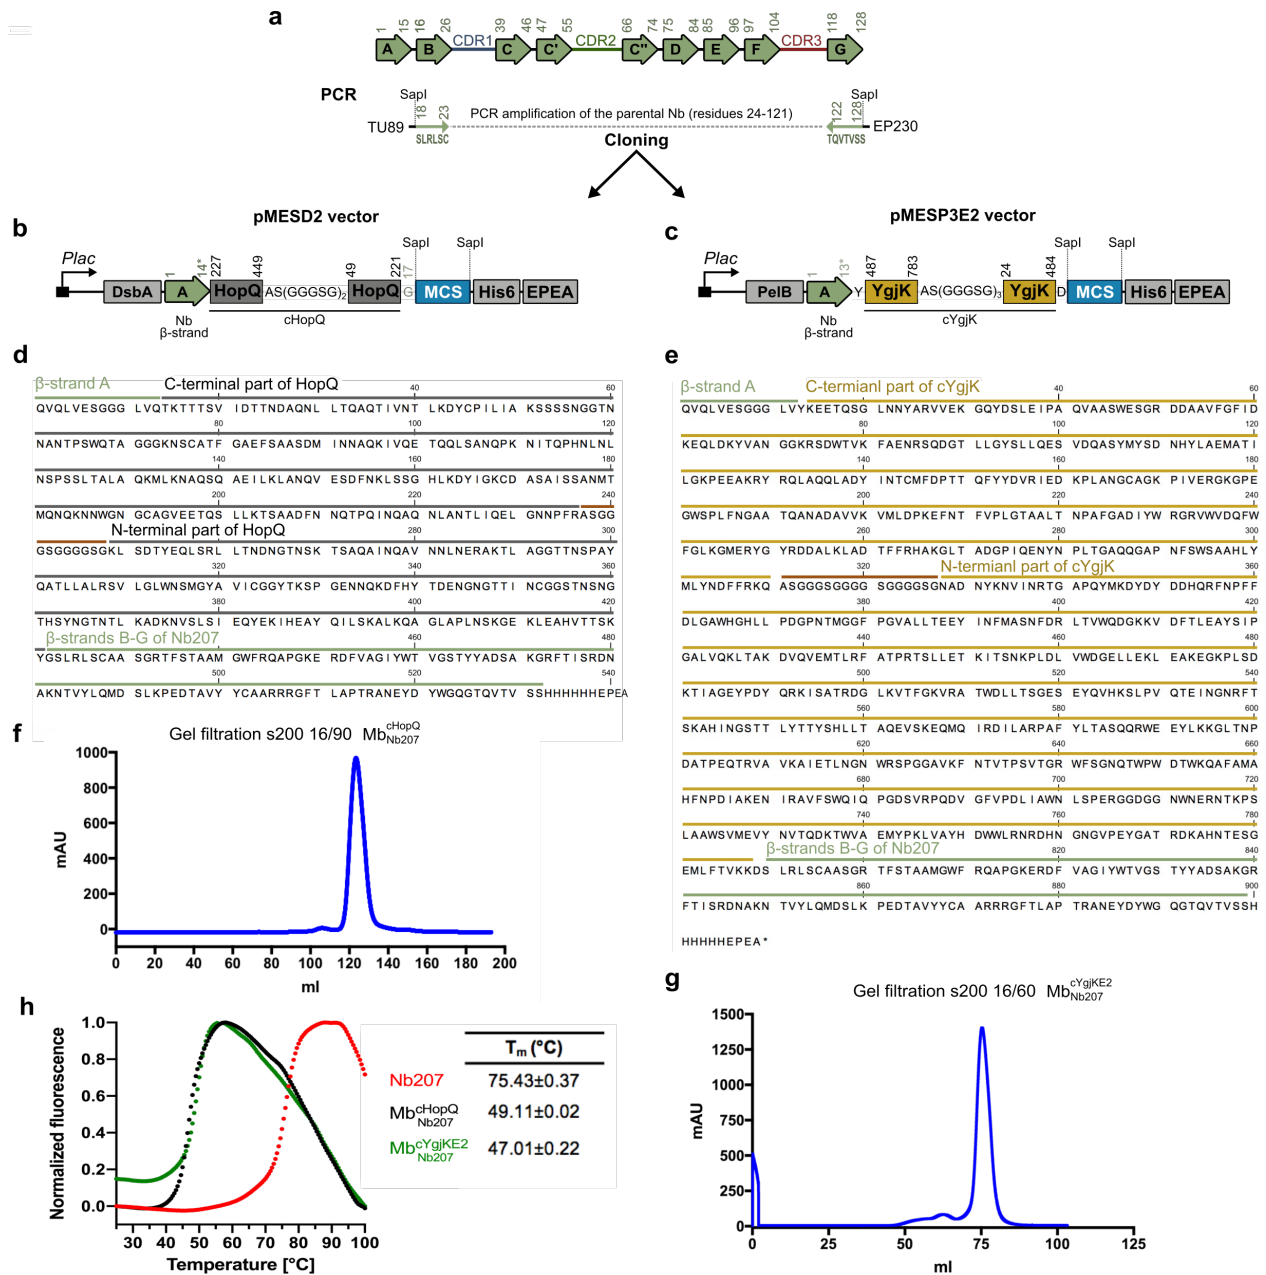

**Supplementary Figure 2. Cloning, expression and purification of megabodies  $\text{Mb}^{\text{cHopQ}}_{\text{Nb207}}$  and  $\text{Mb}^{\text{cYgjKE2}}_{\text{Nb207}}$ .** **a**, Gene fragments encoding  $\beta$ -strands B to G of a nanobody are amplified by PCR using TU89 and EP230 primers and cloned into pMESD2 (**b**) to turn a nanobody into the cHopQ-megabody format or cloned in pMESP3E2 (**c**) for the cYgjK format. The residues of nanobody, HopQ and YgjK are numbered according to IMGT, UniProtKB B5Z8H1 and UniProtKB P42592. **d-e**, Amino acid sequences of  $\text{Mb}^{\text{cHopQ}}_{\text{Nb207}}$  (**d**) and  $\text{Mb}^{\text{cYgjKE2}}_{\text{Nb207}}$  (**e**). **f-g**, Size exclusion profiles (Superdex 200 PG 16/90) of  $\text{Mb}^{\text{cHopQ}}_{\text{Nb207}}$  (**f**) and  $\text{Mb}^{\text{cYgjKE2}}_{\text{Nb207}}$  (**g**), purified from the periplasm of *E. coli* by Ni-NTA affinity chromatography. **h**, Representative melting curves of Nb207,  $\text{Mb}^{\text{cHopQ}}_{\text{Nb207}}$  and  $\text{Mb}^{\text{cYgjKE2}}_{\text{Nb207}}$  measured by thermal shift assays using the partition hydrophobic-binding dye SYPRO<sup>®</sup> Orange. Experiments were performed in triplicates and the raw data were fitted to the Boltzmann's equation using Prism 7 software (GraphPad) to calculate melting temperatures ( $T_m$ ).

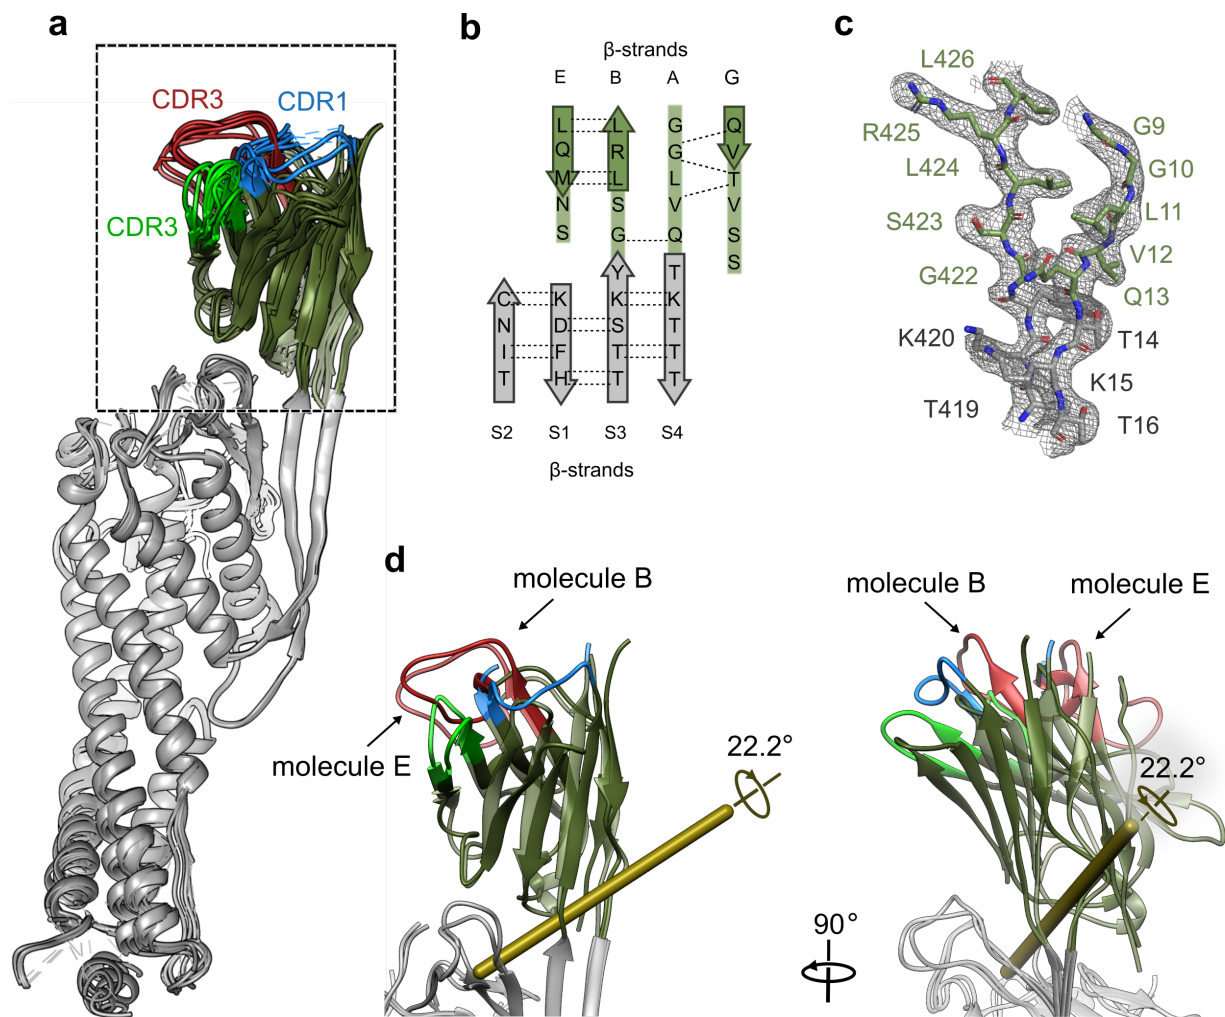

**Supplementary Figure 3. Crystal structure of megabody Mb<sub>Nb207</sub><sup>cHopQ</sup>.** **a**, Comparison of the ten Mb<sub>Nb207</sub><sup>cHopQ</sup> molecules present in the asymmetric unit (PDB ID: 6QD6). Molecules were aligned using the C $\alpha$  atoms of the scaffold protein (cHopQ, grey) manifesting minor bending of the Nb207 part (green). **b**, Schematic representation of the  $\beta$ -sheet topology within the region connecting Nb207 to the scaffold. Hydrogen bonds between backbone atoms are indicated by dotted lines. **c**, 2F $\sigma$ -F $\sigma$  electron density map (contoured at 1.0  $\sigma$ ) containing the peptides connecting Nb207 (green) to cHopQ (grey) in molecule F. **d**, Structural comparison of molecules B and E that possess the most distinct bending of the nanobody part (residues 1-13 and 422-532 of Mb<sub>Nb207</sub><sup>cHopQ</sup>). The rotation axis (gold stick) and angle are calculated for the nanobody part.



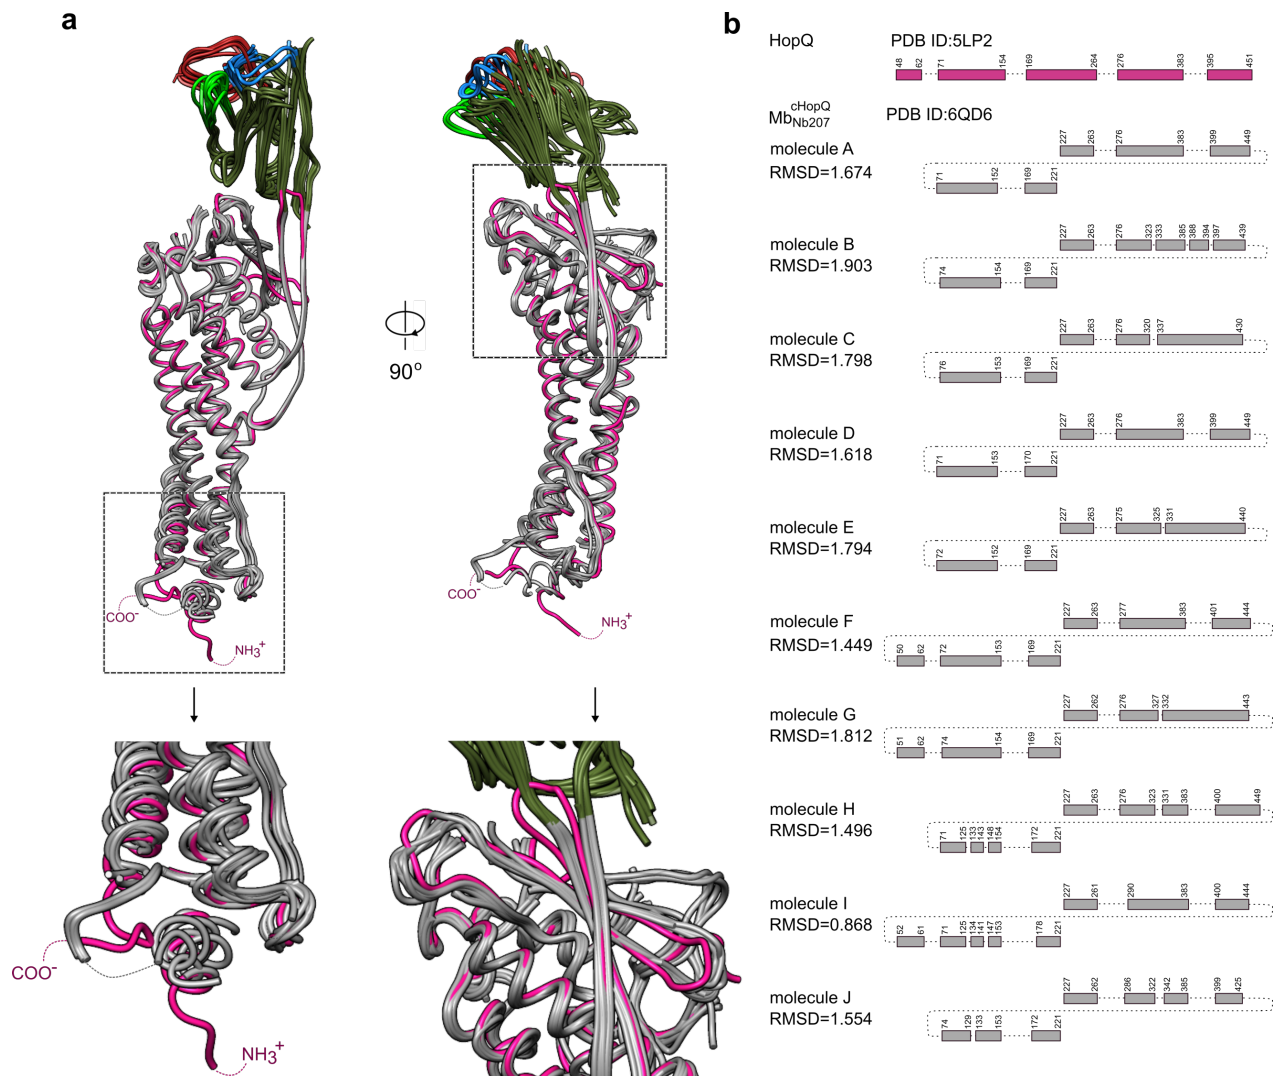

**Supplementary Figure 4. Structural comparison of the parental *H. pylori* adhesin domain to the circularly permuted scaffold in Mb<sup>cHopQ</sup><sub>Nb207</sub>.** **a**, Alignment of each molecule of Mb<sup>cHopQ</sup><sub>Nb207</sub> in the asymmetric unit (coloured in grey-green, PDB ID: 6QD6) onto the *H. pylori* adhesin domain (coloured in magenta, PDB code:5LP2). **b**, The RMSD values between the *H. pylori* adhesin domain (magenta) and the different Mb<sup>cHopQ</sup><sub>Nb207</sub> molecules in the asymmetric unit (grey) were calculated from all corresponding C<sub>α</sub> atoms that are refined in the respective electron density maps. The block diagrams describe the segments that are visible/invisible in the adhesin crystal structure and ten megabody molecules in the asymmetric unit, taking into account the circularly permuted arrangement of the scaffold protein.

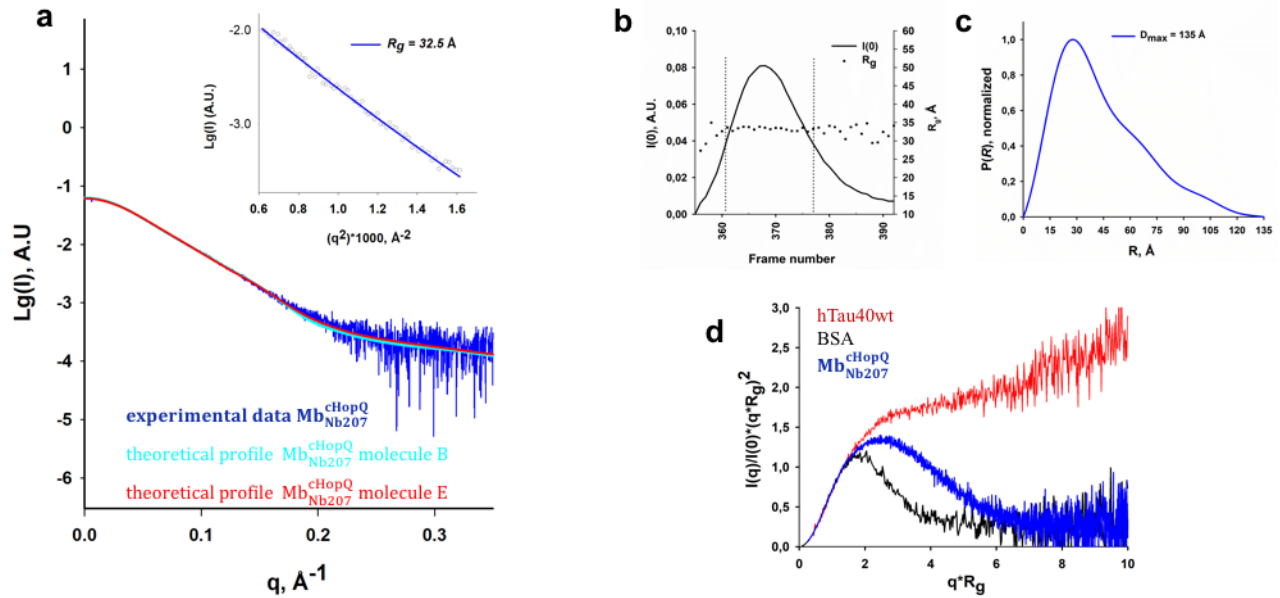

**Supplementary Figure 5. SEC-SAXS analysis of megabody Mb<sup>cHopQ</sup><sub>Nb207</sub>.** **a**, Superposition of the experimental scattering profile of Mb<sup>cHopQ</sup><sub>Nb207</sub> (blue) on the theoretical profiles of molecule B (cyan) and molecule E (red) calculated from the X-ray structure (PDB ID: 6QD6) using CRY SOL ( $\chi^2 = 1.699$  for molecule B and  $\chi^2 = 2.033$  for molecule E). The inset figure shows the linear Guinier region from the experimental scattering curve and is indicative of a non-aggregated protein sample. The respective  $R_g$  value is given. **b**, Elution profile of a SEC-SAXS experiment (black line, frame range of the peak 361-377). A stable  $R_g$  is observed over the entire elution profile (black squares). **c**, Normalised  $P(r)$  profile with derived  $D_{max}$  value. **d**, Dimensionless Kratky plot for Mb<sup>cHopQ</sup><sub>Nb207</sub> (blue) in comparison with two reference proteins: the highly flexible hTau40wt (red) and the globular BSA (black).

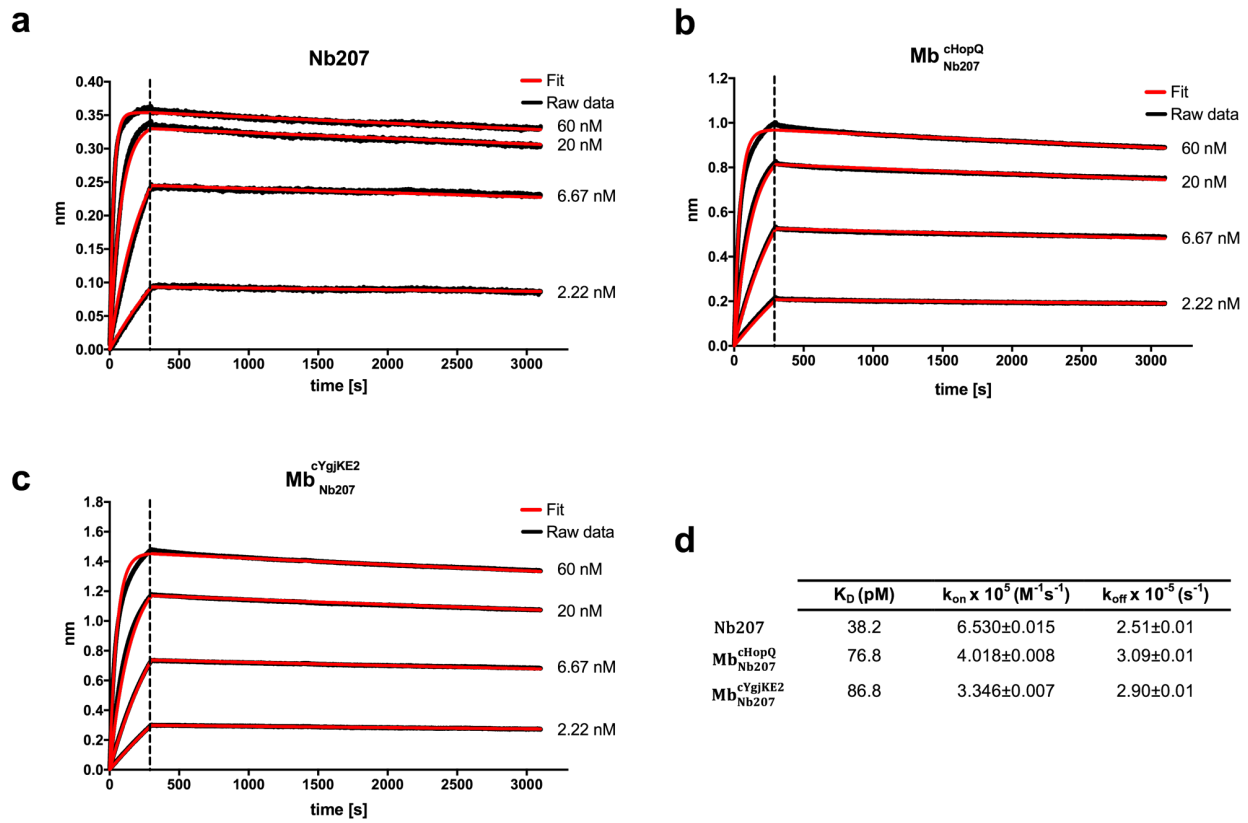

**Supplementary Figure 6. Nb207, Mb<sup>cHopQ</sup><sub>Nb207</sub> and Mb<sup>cYgjKE2</sup><sub>Nb207</sub> bind to the cognate antigen with similar affinities.** Sensograms of the association and dissociation of Nb207 (a), Mb<sup>cHopQ</sup><sub>Nb207</sub> (b) and Mb<sup>cYgjKE2</sup><sub>Nb207</sub> (c) onto immobilized GFP. Biotinylated GFP was immobilized on a Streptavidin (SA) bio-sensor and the binding kinetics were monitored by bio-layer interferometry (BLI) on OctetRED96 (ForteBio). The measured responses (black lines) were fitted to a monophasic 1:1 binding model (red lines). d, Calculated kinetic parameters are shown as mean standard error of the mean (s.e.m.) from n = 3 independent experiments.

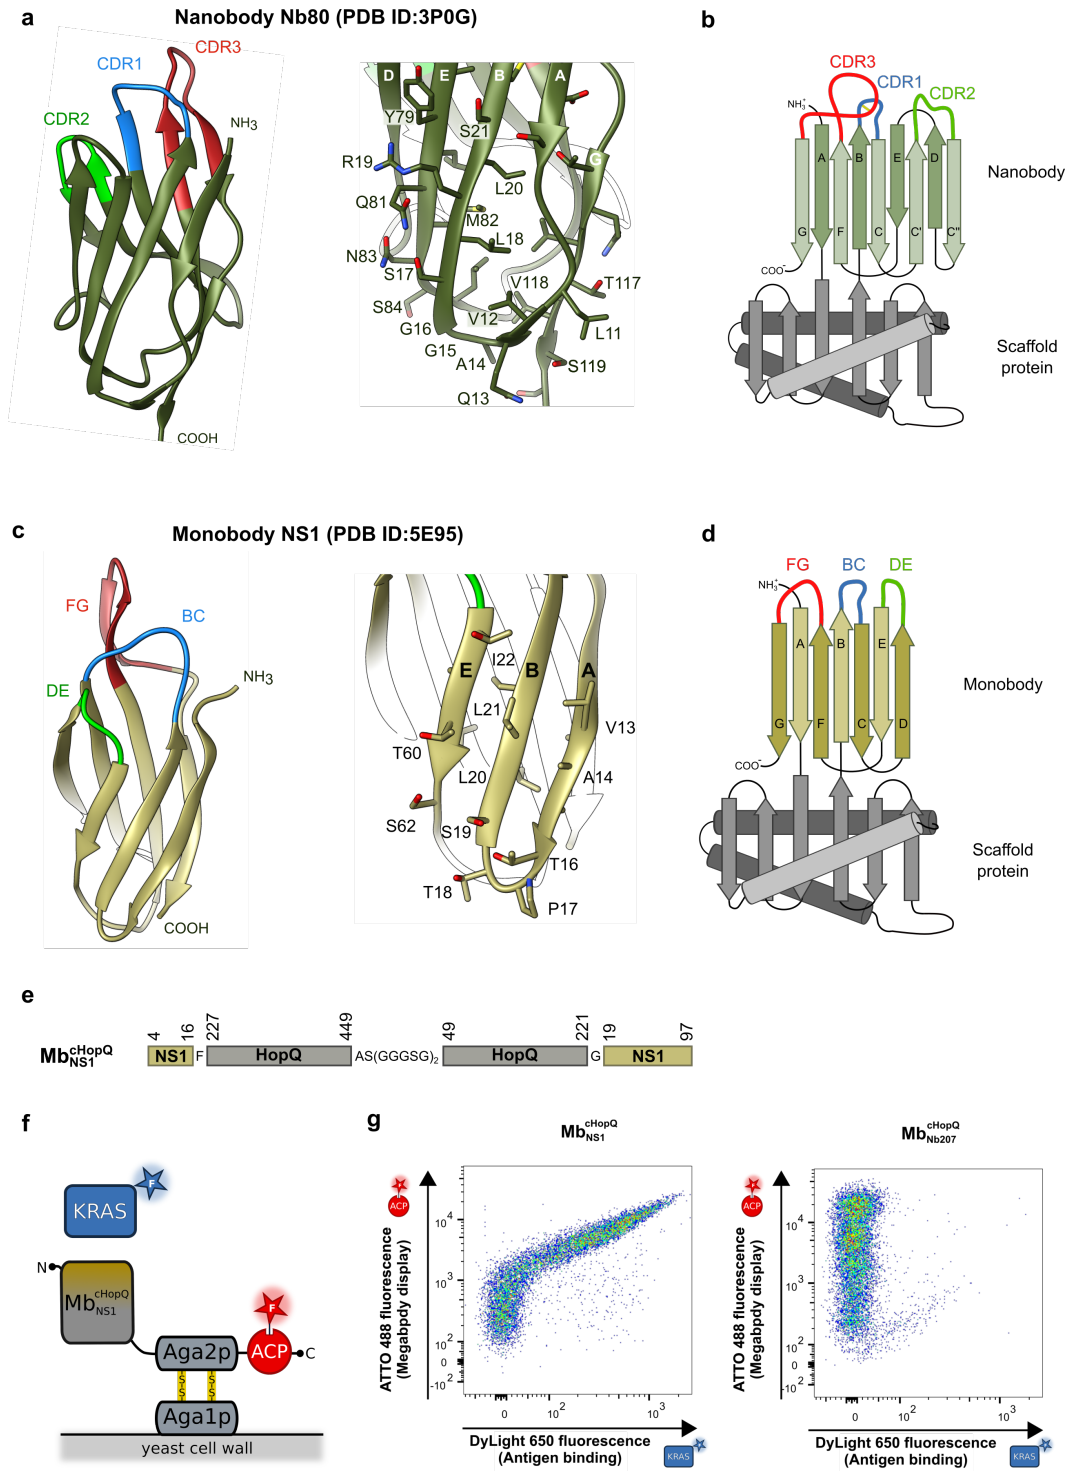

**Supplementary Figure 7. Yeast surface display of megabody Mb<sub>NS1</sub><sup>cHopQ</sup> built from the NS1 monobody that was grafted onto cHopQ.** **a**, Tertiary structure of a nanobody, based on crystal structure of Nb80 nanobody (PDB ID: 3P0G). The side chain conformations of  $\beta$ -strand A and  $\beta$ -strand B are indicated. **b**, Molecular design of a megabody that is assembled from a nanobody and a scaffold protein. **c**, Crystal structure of monobody NS1 (PDB ID: 5E95). The side chain conformations of  $\beta$ -strand A and  $\beta$ -strand B are shown. **d**, Molecular design of a megabody that is assembled from a monobody and a scaffold protein. **e**, Schematic representation of the primary structure of Mb<sub>NS1</sub><sup>cHopQ</sup>. **f**, Mb<sub>NS1</sub><sup>cHopQ</sup> was displayed on the surface of yeast as a Mb<sub>NS1</sub><sup>cHopQ</sup>-Aga2p-ACP fusion, and orthogonally stained with CoA-488 (red star) to monitor the display level. Binding of the antigen was monitored by incubating the yeast cells with 100  $\mu$ M KRAS-DyLight 650 (blue star). **g**, Comparison of flow cytometric dotplots representing yeast cells displaying Mb<sub>NS1</sub><sup>cHopQ</sup> (left panel) and cells displaying Mb<sub>Nb207</sub><sup>cHopQ</sup> (right panel).

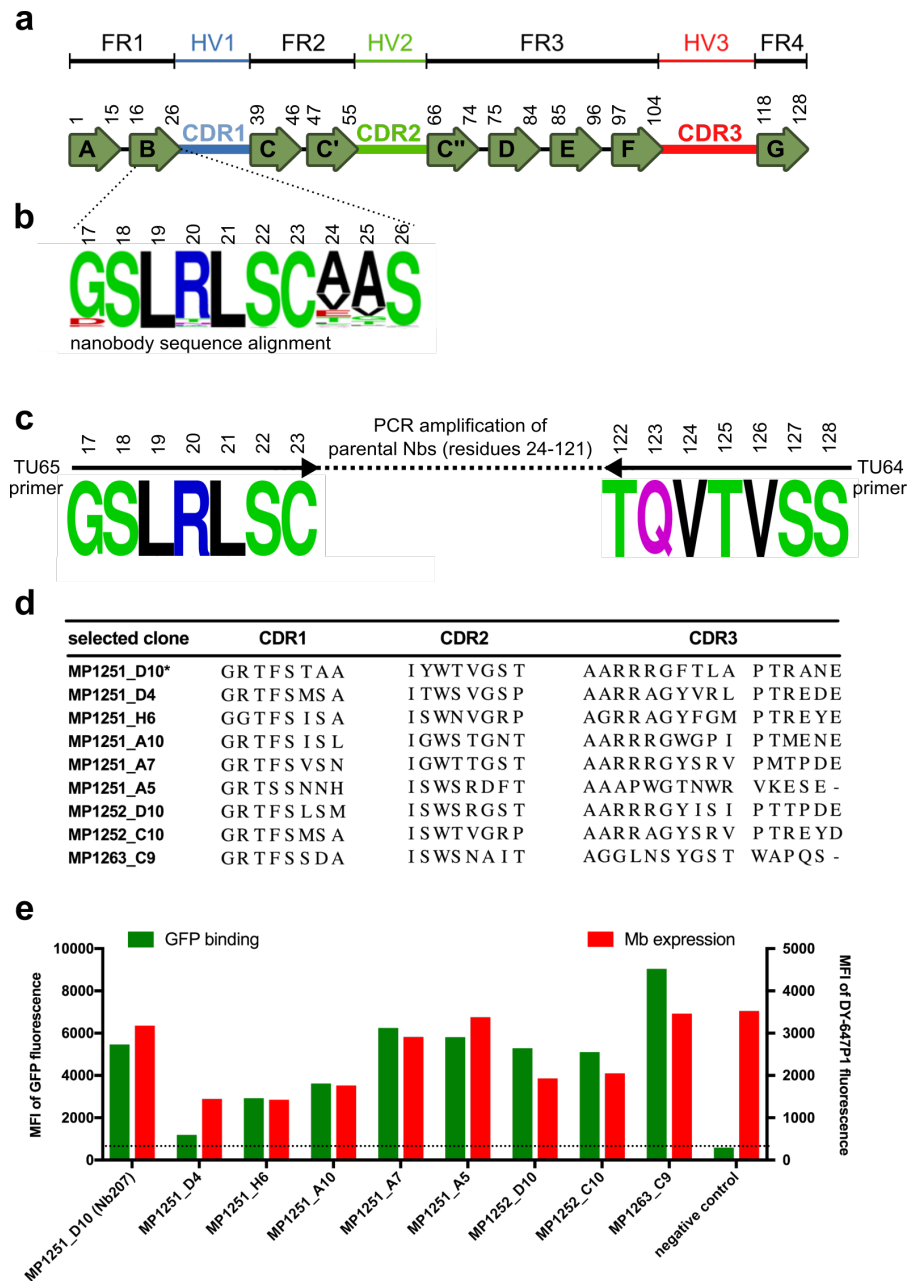

**Supplementary Figure 8. Sequences and binding properties of a representative set of GFP-specific megabodies selected by yeast-display** **a**, Schematic representation of a rearranged gene encoding a VHH domain (nanobody) in camelids. Conserved framework (FR, black) and hypervariable (HV, blue, green and red) regions are indicated and encode nine  $\beta$ -strand and three CDR regions, respectively. CDRs and  $\beta$ -strands of nanobodies are defined according to IMGT numbering. **b**, Alignment of  $\beta$ -strand B sequence, originated from 600 nanobody sequences available in-house (three different animals). **c**, PCR product of the *in vivo* matured nanobody immune libraries amplified using TU65 and TU64 primers (**Supplementary Table 3**). **d**, CDRs composition of the nine megabodies selected by yeast display. CDRs are defined according to IMGT. Selected megabody clone MP1251\_D10 contains the same CDRs composition as the nanobody Nb207, which was discovered by phage display (data not shown). **e**, Flow cytometric analysis of GFP binding for nine yeast clones displaying nine selected megabodies. Individual yeast clones were orthogonally staining with Co-647 and incubated with 100 nM GFP. For each clone, the mean fluorescent intensities (MFI) of the DY-647P1 fluorescence (display level, red bars) and the GFP fluorescence (antigen binding, green bars) were calculated using the FlowJo software and compared to a cell displaying Mb<sup>CHopQ</sup><sub>MP1031\_F2</sub> (the nanobody MP1031\_F2 binds human coagulation Factor IX<sup>8</sup>, negative control). The MFI of GFP fluorescence of a negative control is indicated as a dotted line.



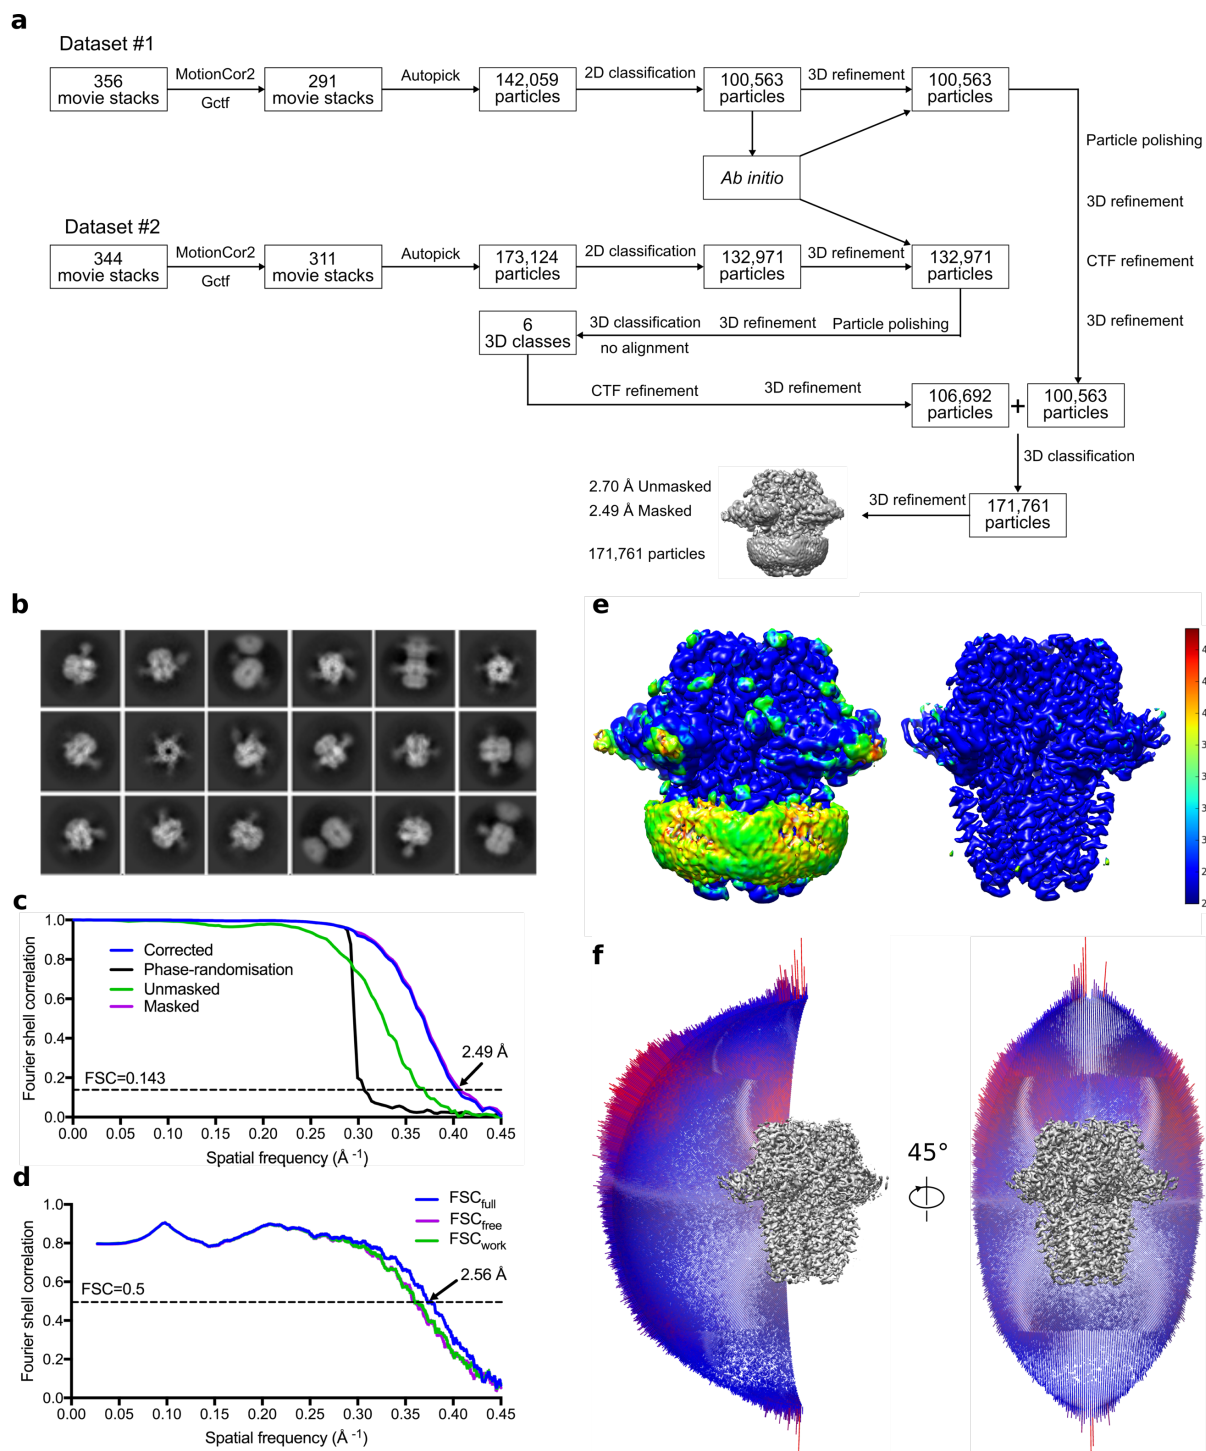

**Supplementary Figure 9. Cryo-EM image processing procedure for high resolution reconstruction of  $\beta 3$  GABA<sub>A</sub>R in complex with to Mb<sup>c7HopQ</sup><sub>Nb25</sub>.** **a**, Graphical overview of cryo-EM data collection and image processing (see Methods). **b**, 2D class averages used for cryo-EM map reconstructions. Aligned micrographs were obtained using FEI Titan Krios, Falcon3 detector and VPP (box size of 256 Å). **c**, FSC curves for the 3D reconstruction using gold-standard refinement in RELION. Data is shown for the phase randomisation, unmasked, masked and phase-randomisation-corrected masked maps. **d**, FSC curves for the atomic model refinement. Data is shown for model versus summed map (FSC<sub>full</sub>), model refined in half-map 1 versus half-map 1 (FSC<sub>work</sub>), and model refined in half-map 1 versus half-map 2 (FSC<sub>free</sub>). **e**, Unsharpened cryo-EM map colored by local resolution (estimated using ResMap) shown at a lower contour level (left) and at a higher level (right). **f**, Angular-distribution histogram of particles used in calculating the final 3D reconstruction for the of histamine bound  $\beta 3$  GABA<sub>A</sub> receptor in a complex with Mb<sup>c7HopQ</sup><sub>Nb25</sub>.



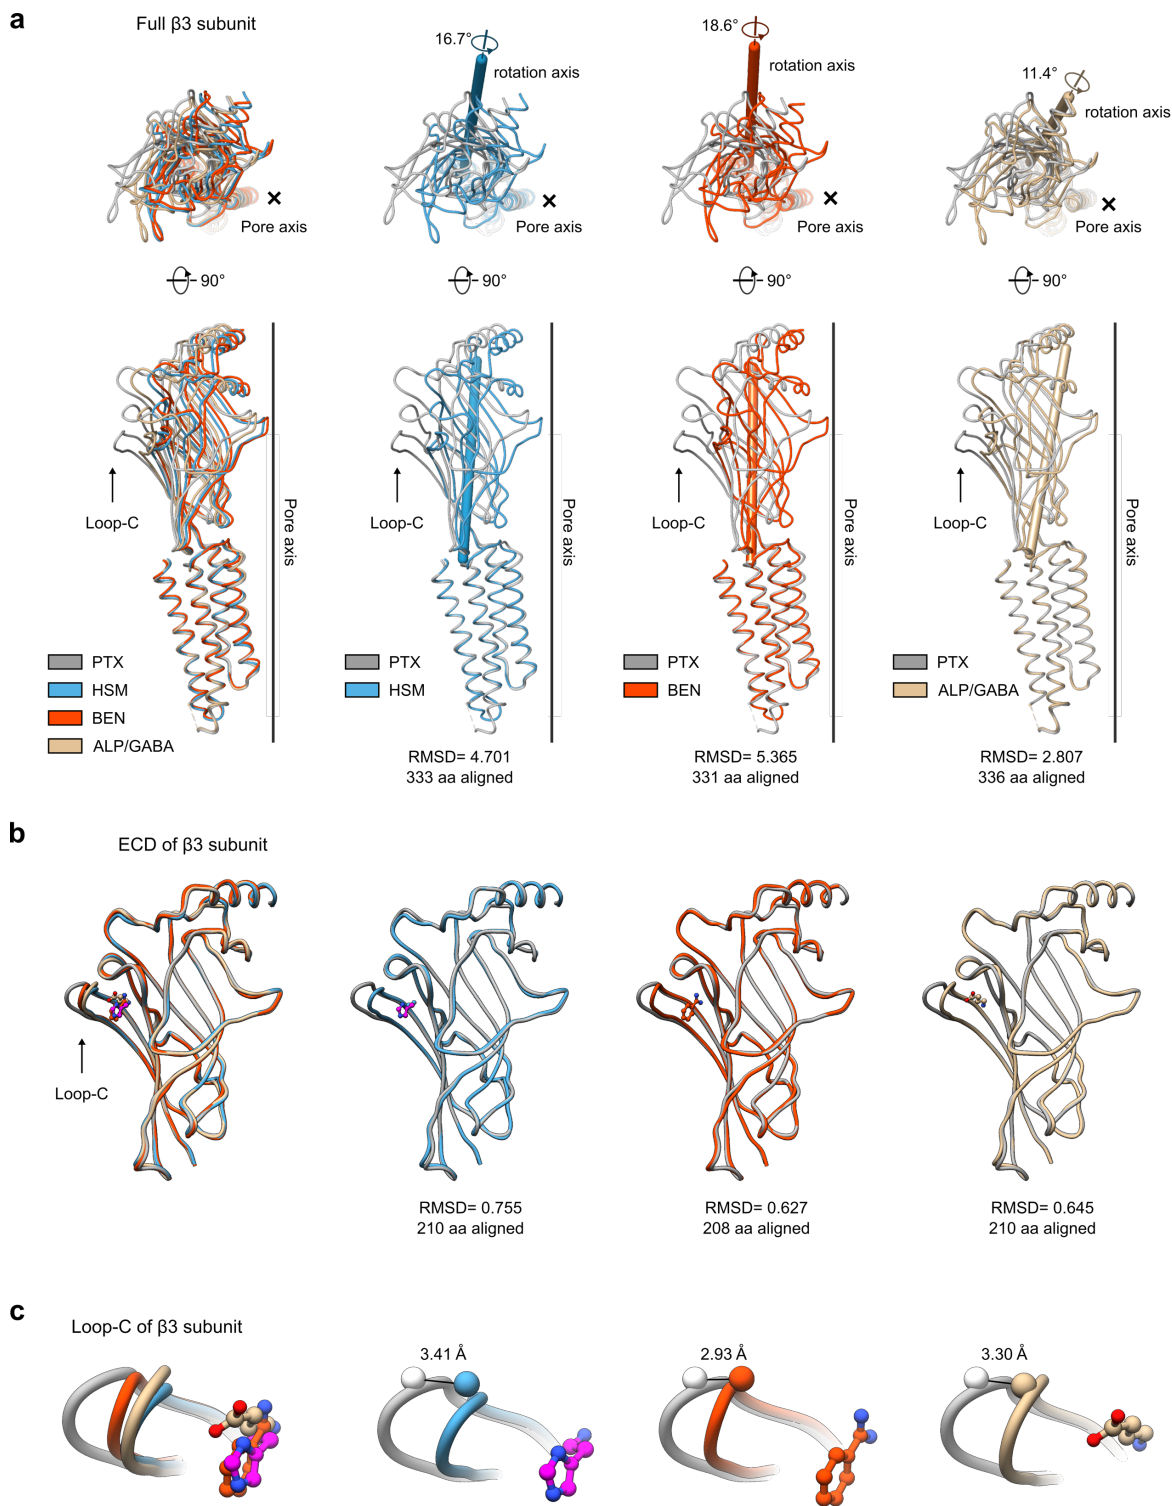

**Supplementary Figure 10. Structural analysis of  $\beta 3$  subunits of PTX-bound, ALP/GABA-bound  $\alpha 1\beta 3\gamma 2L$  GABA<sub>A</sub> receptor and BEN-bound, HSM-bound  $\beta 3$  GABA<sub>A</sub> receptor structures.** **a-c** Superposition of full  $\beta 3$  subunits (**a**), ECD (**b**) and Loop-C (**c**) of PTX-bound  $\alpha 1\beta 3\gamma 2L$  GABA<sub>A</sub> (grey, PDB ID: 6HUG), ALP/GABA-bound  $\alpha 1\beta 3\gamma 2L$  GABA<sub>A</sub> (khaki, PDB ID: 6HUO), BEN-bound  $\beta 3$  GABA<sub>A</sub> (orange, PDB ID: 4COF) and HSM-bound  $\beta 3$  GABA<sub>A</sub> (blue, PDB ID: 6QFA) receptors. **a** Superposition of full subunits on the basis of the global TMD alignment reveals the relative  $\beta 3$  ECD motions upon binding to PTX, ALP/GABA, BEN and HSM where rotation axis (sticks) and angles are indicated. The RMSD values are shown for full  $\beta 3$  subunits. **b** Superposition of ECDs (residues 1-217), where RMSD values are shown for ECDs. **c** Superposition of Loop-C, where differences in distances (Å) between the selected Thr202 C $\alpha$  atoms (shown as spheres) are indicated with lines. The bound histamine (HSM), benzamidine (BEN) and GABA are indicated in magenta, orange and khaki, respectively.

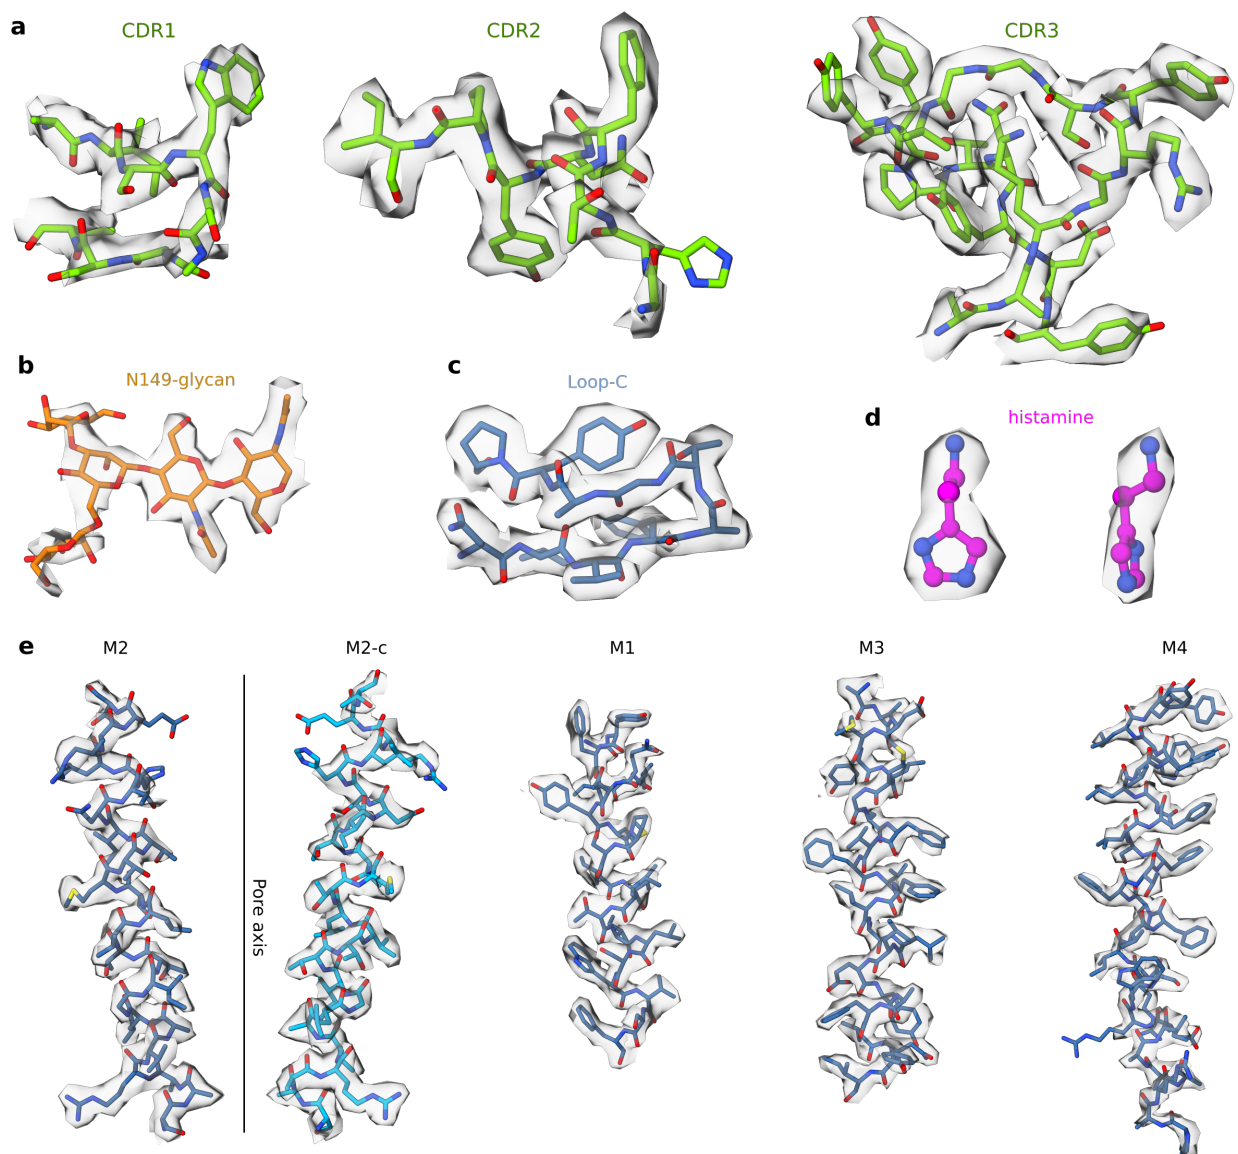

**Supplementary Figure 11. Histamine-bound  $\beta 3$  GABA<sub>A</sub> receptor model-map validation and electron microscopy density.** a-e, Electron microscopy density segments of Mb<sup>c7HopQ</sup><sub>Nb25</sub> CDRs (a) and  $\beta 3$  GABA<sub>A</sub> receptor N149-glycan (b), Loop-C (c), histamine (d),  $\alpha$ -helices of TMD regions (e) (EMDB ID: 4542, PDB ID: 6QFA). Sharpened density maps are contoured at 0.08.

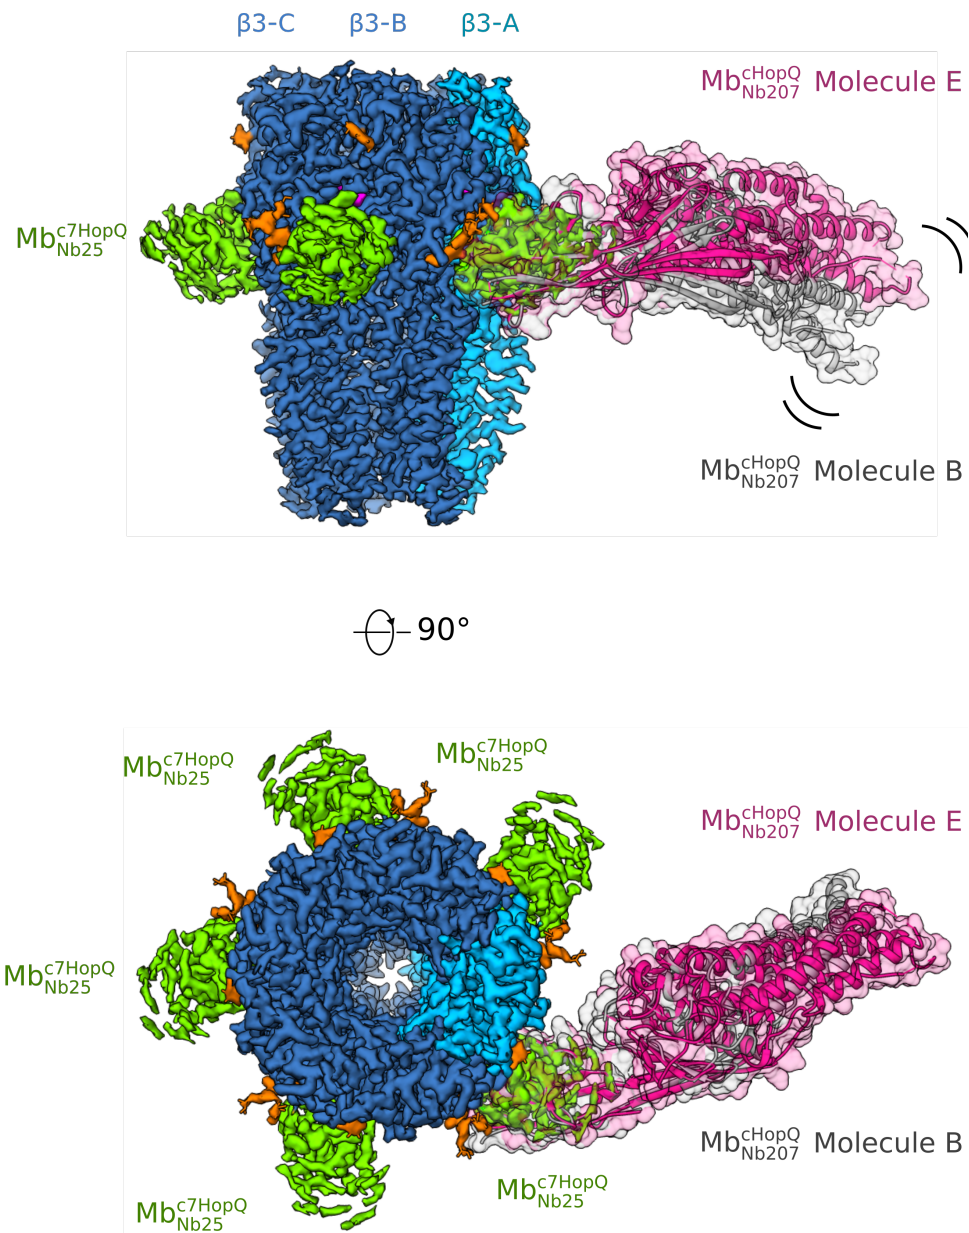

**Supplementary Figure 12. Molecular docking of the Mb<sup>cHopQ</sup><sub>Nb207</sub> crystal structure onto the cryoEM map of the β3 GABA<sub>A</sub> receptor in a complex with Mb<sup>c7HopQ</sup><sub>Nb25</sub>.** The two most distinct Mb<sup>cHopQ</sup><sub>Nb207</sub> molecules from the asymmetric unit of the crystal structure (molecules B and E, PDB ID: 6QD6) are coloured in grey and magenta, respectively. They were aligned to the part of Mb<sup>c7HopQ</sup><sub>Nb25</sub> that was refined in the cryo-EM structure of the β3 GABA<sub>A</sub>R in a complex with Mb<sup>c7HopQ</sup><sub>Nb25</sub> (EMDB ID: 4542, PDB ID: 6QFA).

**Supplementary Table 1.** Amino acid sequence of Nb207.**Nb207**

QVQLQESGGGLVQAGGSLRLSCAASGRTFSTAAMGWFRQAPGKERDFVAGIYWTVGSTY  
YADSAKGRFTISRDNNAKNTVYLQMDSLKPEDTAVYYCAARRRGFTLAPTRANEYDYWG  
QGTQVTVSS

**Supplementary Table 2.** Data collection and refinement statistics.

|                                                     |  | Mb <sup>cHopQ</sup> <sub>Nb207</sub> |
|-----------------------------------------------------|--|--------------------------------------|
| <b>Data collection</b>                              |  |                                      |
| Space group                                         |  | P1                                   |
| Cell dimensions                                     |  |                                      |
| <i>a</i> , <i>b</i> , <i>c</i> (Å)                  |  | 71.17, 92.92, 244.22                 |
| $\alpha$ , $\beta$ , $\gamma$ (°)                   |  | 92.05, 96.93, 112.15                 |
| Resolution (Å)                                      |  | 41.45-2.84 (2.90-2.84) *             |
| <i>R</i> <sub>meas</sub>                            |  | 0.05 (0.66)                          |
| <i>I</i> / $\sigma$ <i>I</i>                        |  | 11.65 (1.45)                         |
| Completeness (%)                                    |  | 95.6 (94.5)                          |
| Redundancy                                          |  | 1.78 (1.77)                          |
| <b>Refinement</b>                                   |  |                                      |
| Resolution (Å)                                      |  | 38.85-2.84 (2.90-2.84)               |
| No. reflections                                     |  | 230255 (13649)                       |
| <i>R</i> <sub>work</sub> / <i>R</i> <sub>free</sub> |  | 0.225/0.251                          |
| No. Atoms                                           |  |                                      |
| Protein                                             |  | 33077                                |
| Ion Cl <sup>-</sup>                                 |  | 1                                    |
| Water                                               |  | 114                                  |
| B factor                                            |  |                                      |
| Protein                                             |  | 99.9                                 |
| Ion Cl <sup>-</sup>                                 |  | 91.9                                 |
| Water                                               |  | 91.7                                 |
| R.m.s. deviations                                   |  |                                      |
| Bond lengths (Å)                                    |  | 0.02                                 |
| Bond angles (°)                                     |  | 1.87                                 |

\*Values in parentheses are for highest resolution shell.

**Supplementary Table 3.** Cryo-EM data collection, refinement and validation statistics.

| $\beta 3$ GABA <sub>A</sub> R - Mb <sup>e7HopQ</sup> <sub>Nb25</sub> complex |                     |
|------------------------------------------------------------------------------|---------------------|
| EMDB: 4542                                                                   |                     |
| PDB: 6QFA                                                                    |                     |
| <b>Data collection and processing</b>                                        |                     |
| Microscope, location                                                         | Krios-II, MRC-LMB   |
| Magnification                                                                | 75,000              |
| Voltage (kV)                                                                 | 300                 |
| Detector                                                                     | Falcon 3EC with VPP |
| Electron Dose (e <sup>-</sup> /Å <sup>2</sup> )                              | 30                  |
| Exposure time (s)                                                            | 60                  |
| Pixel Size (Å)                                                               | 1.07                |
| Dose rate (e <sup>-</sup> /pixel/s)                                          | 0.4                 |
| Frame number                                                                 | 75                  |
| Defocus Range (μm)                                                           | -0.7 to -0.5        |
| Microrgraphs collected (no.)                                                 | 700                 |
| Microrgraphs selected (no.)                                                  | 602                 |
| Initial particle images (no.)                                                | 315,183             |
| Final particle images (no.)                                                  | 171,761             |
| Symmetry imposed                                                             | C5                  |
| Map resolution (Å)                                                           | 2.49                |
| FSC threshold                                                                | 0.143               |
| Map resolution range (Å) <sup>a</sup>                                        | 2.25-5.95           |
| <b>Refinement</b>                                                            |                     |
| Initial model used (PDB code)                                                | 4COF, 5O8F          |
| Model resolution (Å) <sup>b</sup>                                            | 2.56                |
| FSC threshold                                                                | 0.5                 |
| Model resolution range (Å)                                                   | 2.56                |
| Map sharpening <i>B</i> factor (Å <sup>2</sup> )                             | -68                 |
| Model composition                                                            |                     |
| Protein residues                                                             | 2,270               |
| Non-hydrogen atoms                                                           | 18,755              |
| Protein atoms                                                                | 18,240              |
| N-linked glycan atoms                                                        | 375                 |
| HSM atoms                                                                    | 40                  |
| R.m.s. deviations                                                            |                     |
| Bond lengths (Å)                                                             | 0.005               |
| Bond angles (°)                                                              | 0.761               |
| Validation                                                                   |                     |
| MolProbity score                                                             | 1.28                |
| Clashscore                                                                   | 5.3                 |
| Poor rotamers (%)                                                            | 0                   |
| Ramachandran plot                                                            |                     |
| Favoured (%)                                                                 | 98.17               |
| Allowed (%)                                                                  | 1.83                |
| Disallowed (%)                                                               | 0                   |

<sup>a</sup>Local resolution range. <sup>b</sup>Resolution at which FSC between map and model is 0.5.

**Supplementary Table 4.** Primer list.

| 5' – 3' sequence |                                              |
|------------------|----------------------------------------------|
| EP230            | AGGACTGCTCTTCCACTGGAGACGGTGACCTGGGT          |
| TU64             | CCCTCCACCAGAGCCACCTCCCAAGCTTGAGACGGTGACCTGGG |
| TU65             | GCATGTAACCACATCAAAGTATGGATCCCTGAGACTCTCCTG   |
| TU89             | CCTTGAGCTCTTCGTCCTGAGACTCTCCTG               |
